# Supplementary material for: Circulating but not faecal short-chain fatty acids are related to insulin sensitivity, lipolysis and GLP-1 concentrations in humans
Source: Springer Nature journal article supplement (doi:10.1038/s41598-019-48775-0), 2019-08-29
Supplement: 41598_2019_48775_MOESM1_ESM.pdf [file 41598_2019_48775_MOESM1_ESM.pdf]

SUPPLEMENTARY FIGURE 1

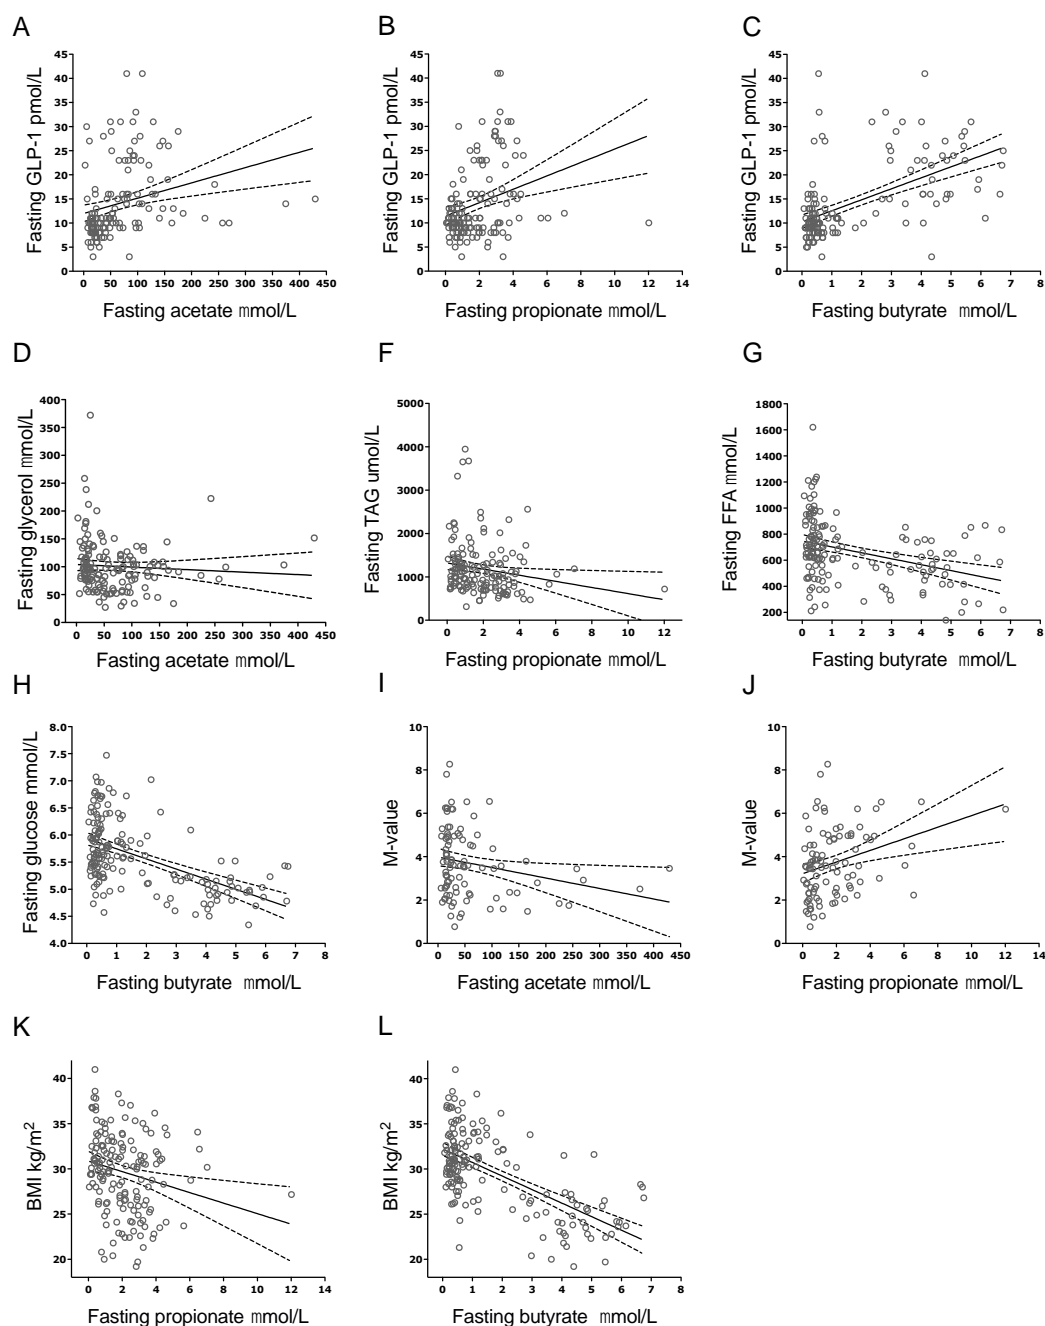

**Supplementary Figure 1** Associations between metabolic parameters, BMI and insulin sensitivity and fasting circulating SCFA. Linear regression scatter plots of fasting circulating SCFA with fasting GLP-1 (A-C), fasting acetate with fasting glycerol (D), fasting propionate with fasting TAG (F), fasting butyrate with FFA (G) and fasting glucose (H), fasting acetate with M-value (I), fasting propionate with M-value (J) and BMI (K) and fasting butyrate with BMI (L). GLP-1 glucagon like peptide 1, TAG triacylglycerol, FFA free fatty acids, BMI body mass index
